# Supplementary material for: Hydrophilic amorphous Cr2O3 supported Co species toward efficient hydrogen production from ammonia borane under visible light irradiation
Source: Royal Society of Chemistry journal article supplement (doi:10.1039/d3ra07367j), 2023-01-01
Supplement: d3ra07367j1.pdf [file d3ra07367j1.pdf]

**Hydrophilic amorphous Cr<sub>2</sub>O<sub>3</sub> supported Co species toward efficient hydrogen production from ammonia borane under visible light irradiation**

Fenglong Wu<sup>\*a</sup> and Jin Song<sup>\*a</sup>

<sup>a</sup> Department of Chemical and Environmental Engineering, Hetao College, Bayan Nur 015000, China

E-mail: wufenglong1983@126.com (F. Wu), jinsonght@sina.com (J. Song)

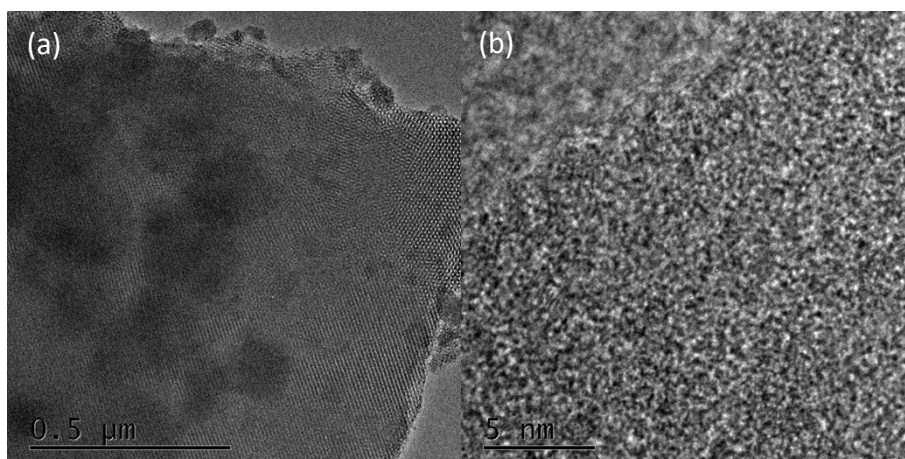

**Fig. S1** TEM and HRTEM images of  $\text{Cr}_2\text{O}_3\text{-F-0.5}$ .

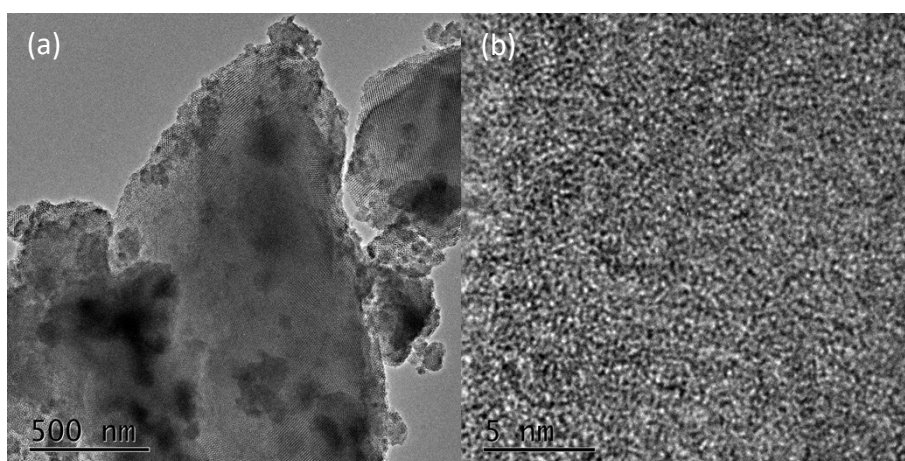

**Fig. S2** TEM and HRTEM images of  $\text{Cr}_2\text{O}_3\text{-E-0.5}$ .

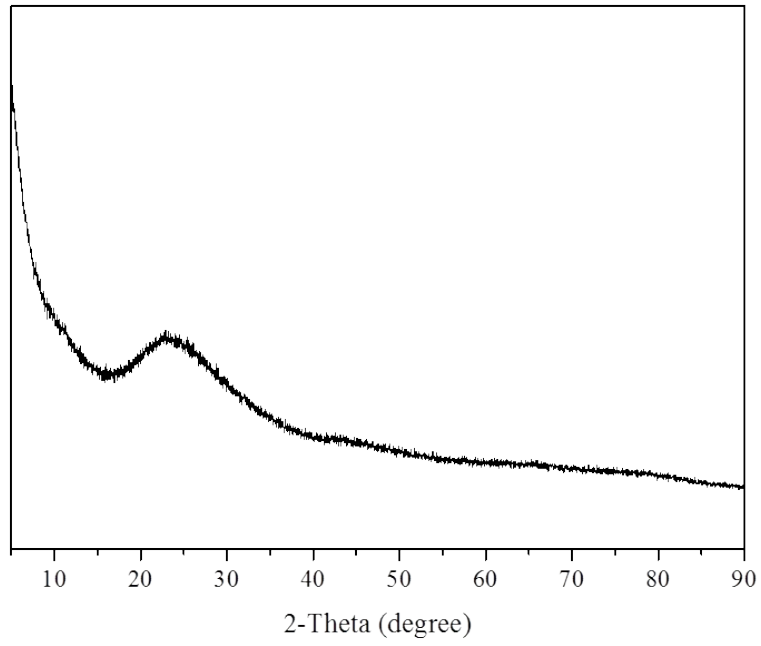

**Fig. S3** XRD patterns of Cr<sub>2</sub>O<sub>3</sub>-E-0.5

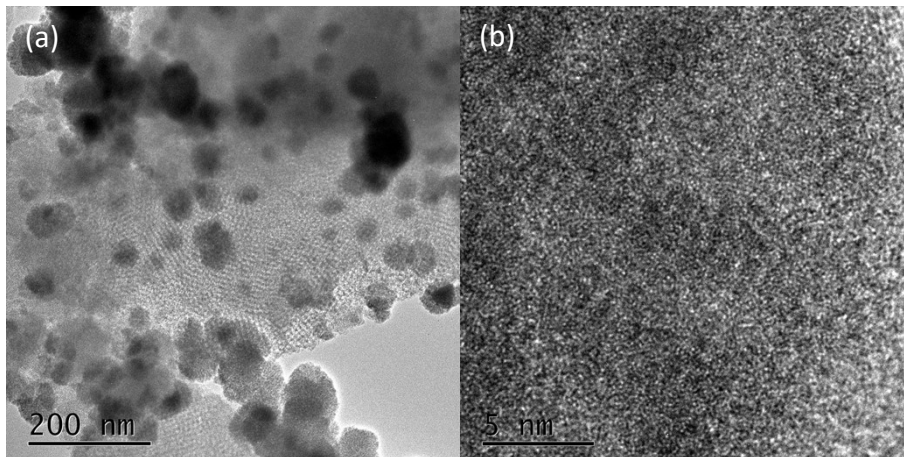

**Fig. S4** TEM and HRTEM images of Co/Cr<sub>2</sub>O<sub>3</sub>-F-0.5.

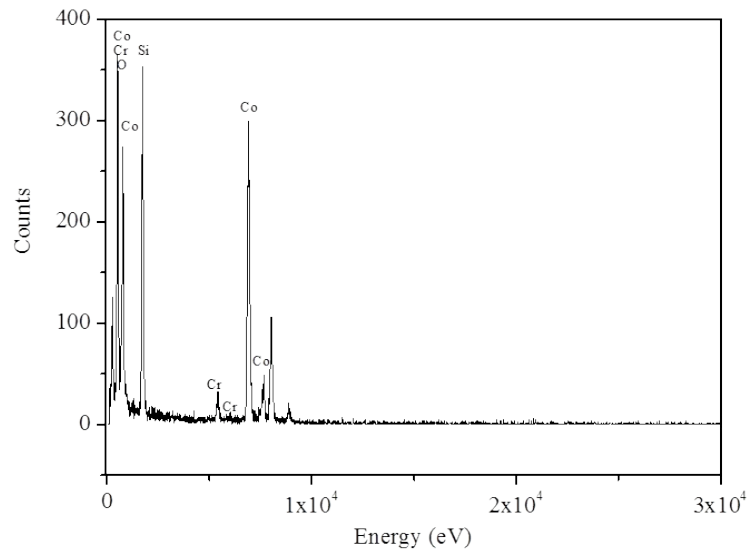

**Fig. S5** EDX spectra of Co/Cr<sub>2</sub>O<sub>3</sub>-F-0.5.

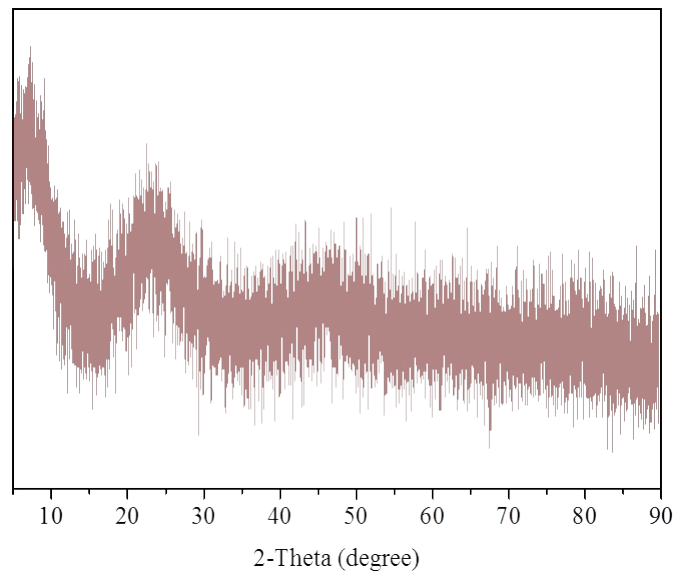

**Fig. S6** XRD patterns of Co/Cr<sub>2</sub>O<sub>3</sub>-F-0.5.

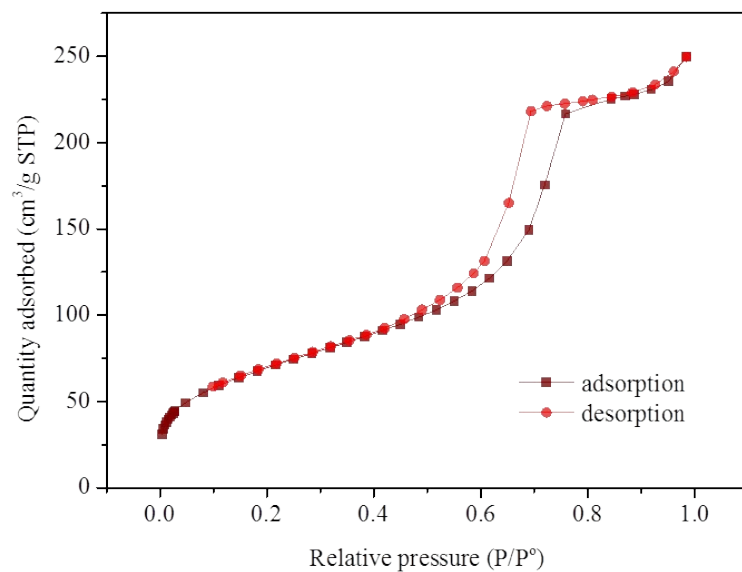

**Fig. S7** N<sub>2</sub> adsorption-desorption isotherms of Cr<sub>2</sub>O<sub>3</sub>-F-0.5.

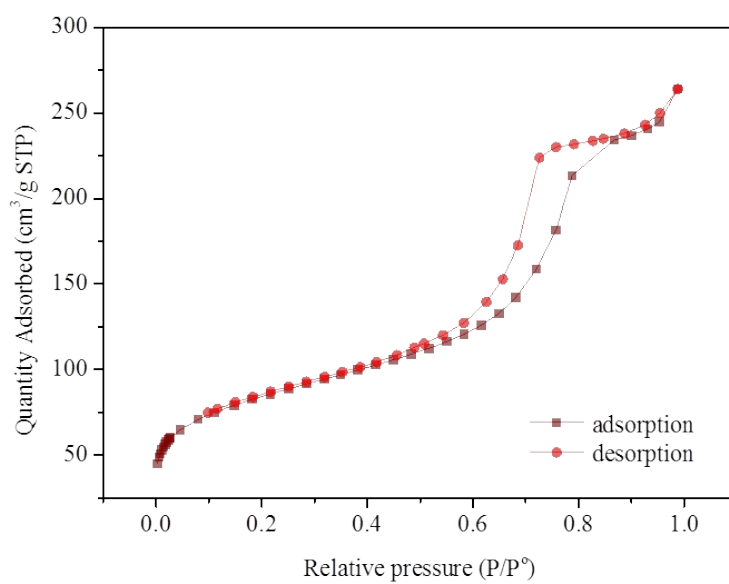

**Fig. S8** N<sub>2</sub> adsorption-desorption isotherms of Co/Cr<sub>2</sub>O<sub>3</sub>-F-0.5.

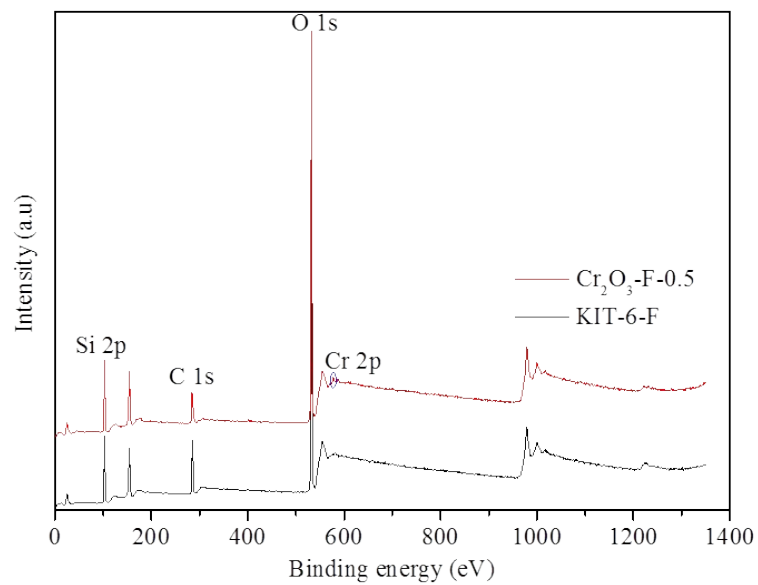

**Fig. S9** XPS spectra for Cr<sub>2</sub>O<sub>3</sub>-F-0.5 and KIT-6-F.

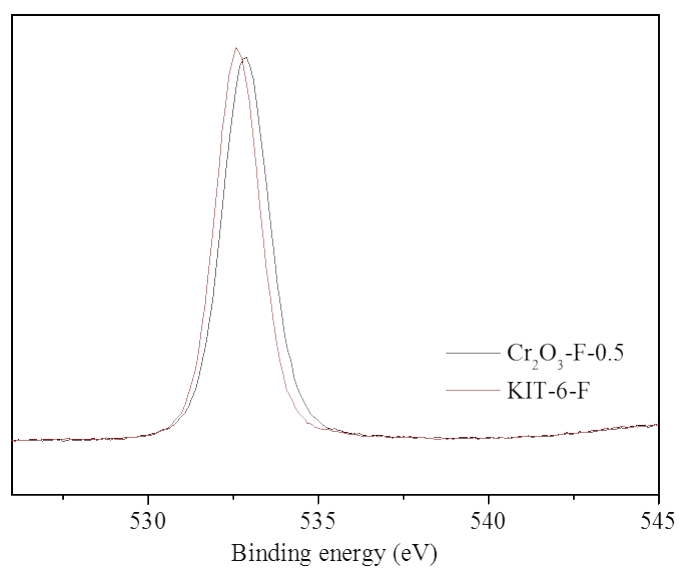

**Fig. S10** XPS spectra of O 1s in Cr<sub>2</sub>O<sub>3</sub>-F-0.5 and KIT-6-F.

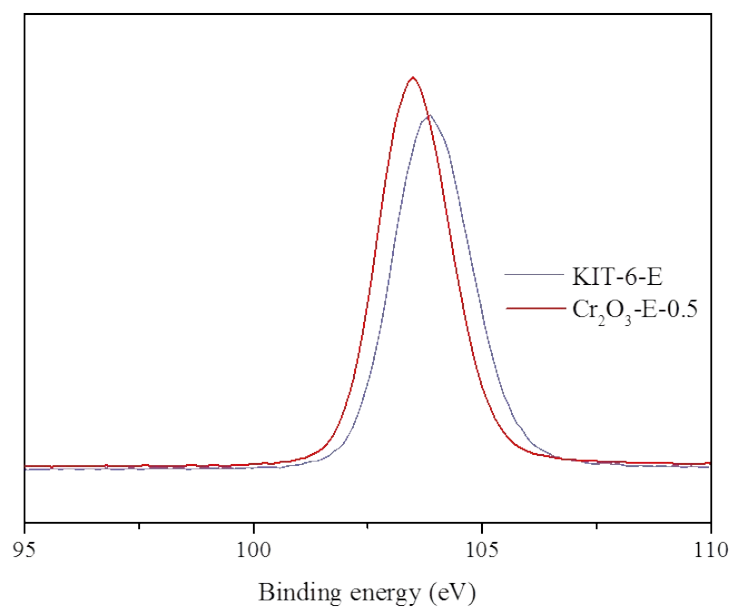

**Fig. S11** XPS spectra of Si 2p in Cr<sub>2</sub>O<sub>3</sub>-E-0.5 and KIT-6-E.

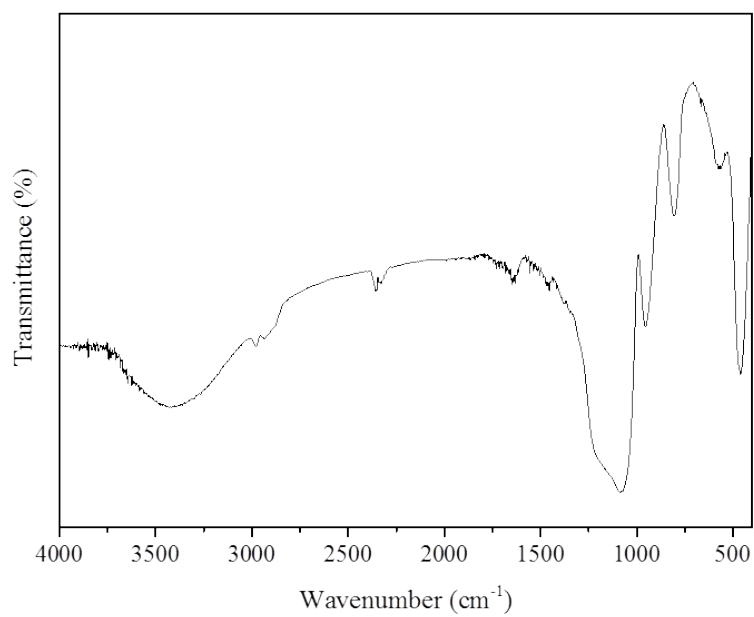

**Fig. S12** FTIR spectra of KIT-6-F.

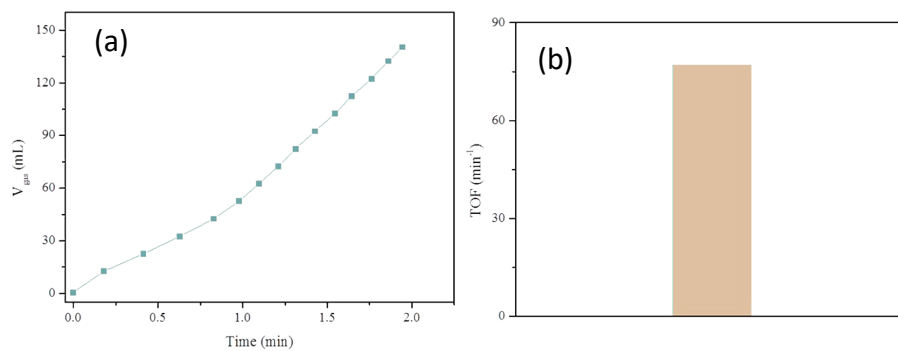

**Fig. S13** Plots of time versus volume of  $\text{H}_2$  evolution from  $\text{NH}_3\text{BH}_3$  over  $\text{Cr}_2\text{O}_3\text{-F-0.5-M}$  (a) under visible light irradiation, (b) corresponding TOF value.
